# Supplementary material for: The correlation between locomotor performance and hindlimb kinematics during burst locomotion in the Florida scrub lizard,Sceloporus woodi
Source: Oxford University Press journal article supplement (doi:10.1242/jeb.058867), 2012-01-12
Supplement: jeb058867tables2.pdf [file jeb058867tables2.pdf]

Table S2. Classification table for discriminant function analysis (DFA) using step as a classification variable and kinematic variables as covariates

| Actual step no. | Step no. as classified by DFA |          |          |          |          | Misclassified steps (%) | Misclassified strides (%) |
|-----------------|-------------------------------|----------|----------|----------|----------|-------------------------|---------------------------|
|                 | 1                             | 2        | 3        | 4        | 5        |                         |                           |
| 1               | 18                            | <i>1</i> | <i>1</i> | 0        | 0        | 10                      | 10                        |
| 2               | 0                             | 3        | 2        | <i>1</i> | 0        | 50                      | 17                        |
| 3               | <i>1</i>                      | 3        | 9        | 0        | <i>1</i> | 36                      | 14                        |
| 4               | 0                             | 0        | 0        | 6        | 0        | 0                       | 0                         |
| 5               | 0                             | 0        | <i>1</i> | 2        | 11       | 21                      | 7                         |

Misclassified steps is the total percentage of steps not classified as the correct step (the overall misclassification rate was 22%).

Misclassified strides is the total percentage not classified correctly using our stride based grouping (step 1=stride 1; steps 2 and 3=stride 2; steps 4 and 5=stride 3). Numbers in italics represent data points that would still be misclassified using our stride-based grouping (six out of 60).
