# Supplementary material for: The correlation between locomotor performance and hindlimb kinematics during burst locomotion in the Florida scrub lizard,Sceloporus woodi
Source: Oxford University Press journal article supplement (doi:10.1242/jeb.058867), 2012-01-12
Supplement: jeb058867tables3.pdf [file jeb058867tables3.pdf]

Table S3. Classification table for discriminant function analysis (DFA) using step as a classification variable and performance variables as covariates

| Actual step no. | Step no. as classified by DFA |   |          |          |   | Misclassified steps (%) | Misclassified strides (%) |
|-----------------|-------------------------------|---|----------|----------|---|-------------------------|---------------------------|
|                 | 1                             | 2 | 3        | 4        | 5 |                         |                           |
| 1               | 17                            | 2 | <i>1</i> | 0        | 0 | 15                      | 15                        |
| 2               | 0                             | 5 | 0        | <i>1</i> | 0 | 17                      | 17                        |
| 3               | 0                             | 3 | 9        | <i>2</i> | 0 | 36                      | 14                        |
| 4               | 0                             | 0 | 0        | 5        | 1 | 17                      | 0                         |
| 5               | 0                             | 0 | <i>1</i> | 4        | 9 | 36                      | 7                         |

Misclassified steps is the total percentage of steps not classified as the correct step (the overall misclassification rate was 25%).

Misclassified strides is the total percentage not classified correctly using our stride based grouping (step 1=stride 1; steps 2 and 3=stride 2; steps 4 and 5=stride 3). Numbers in italics represent data points that would still be misclassified using our stride-based grouping (seven out of 60).
